# Supplementary material for: Changes of Taste, Smell and Eating Behavior in Patients Undergoing Bariatric Surgery: Associations with PROP Phenotypes and Polymorphisms in the Odorant-Binding Protein OBPIIa and CD36 Receptor Genes
Source: PubMed Central journal article supplement (PMC7830302; doi:10.3390/nu13010250), 2021-01-16
Supplement: nutrients-13-00250-s001.pdf [file nutrients-13-00250-s001.pdf]

## Supplemental Material:

### *Bariatric surgery-induced effects on anthropometric parameters*

Table S1 shows mean values ( $\pm$ SEM) of the anthropometric parameters defining the body composition determined in the participants before (T0), one month (T1) and six months (T2) after bariatric surgery. Repeated-measures ANOVA showed that all parameters significantly varied with time (BW:  $F_{(1.34,66.84)} = 331.70$ ,  $p < 0.00001$ ; BMI,  $F_{(1.42,71.09)} = 420.28$ ,  $p < 0.00001$ ; % TWL:  $F_{(1,50)} = 528.15$ ,  $p < 0.00001$ ; % EWL:  $F_{(1,50)} = 513.13$ ,  $p < 0.00001$ ; Neck:  $F_{(1.13,55.18)} = 13.042$ ,  $p = 0.00041$ ; Waist:  $F_{(1.46,71.73)} = 121.95$ ,  $p < 0.00001$ ; Hip:  $F_{(2,100)} = 231.57$ ,  $p < 0.00001$ ; WHR:  $F_{(1.50,73.45)} = 10.483$ ,  $p = 0.0004$ ; FFM:  $F_{(1.67,80.11)} = 111.78$ ,  $p < 0.00001$ ; FM:  $F_{(1.26,60.49)} = 79.599$ ,  $p < 0.00001$ ; TBW:  $F_{(1.09,52.18)} = 3.216$ ,  $p = 0.0050$ ; % FFM:  $F_{(1.62,78.01)} = 159.12$ ,  $p < 0.00001$ ; % FM:  $F_{(1.55,74.68)} = 216.12$ ,  $p < 0.00001$ ; % TBW:  $F_{(2,100)} = 3.291$ ,  $p = 0.041$ ). Post hoc comparisons showed that values of BW, BMI, circumferences of waist, hip, and neck, FFM, FM, TBW and % FM decreased from T0 to T1, and decreased even further from T1 to T2, when patients lost 28% of total weight and 68% of excess of weight. The opposite was true for %FFM, which increased from T0 to T1 and increased even further from T1 to T2. There were no significant differences related to type of surgery ( $p > 0.05$ ) (data not shown).

**Table S1.** Anthropometric parameters determined before (T0), one month (T1) and six months (T2) after bariatric surgery.

|                          | T0     |            | T1      |            | T2                 |            | $P^a$   | $P^b$         |
|--------------------------|--------|------------|---------|------------|--------------------|------------|---------|---------------|
| BW (kg)                  | 115.42 | $\pm$ 3.67 | 99.85*  | $\pm$ 3.02 | 82.40*#            | $\pm$ 2.62 | <0.0000 | < 0.0000      |
| BMI (kg/m <sup>2</sup> ) | 43.20  | $\pm$ 0.79 | 37.35*  | $\pm$ 0.57 | 30.78*#            | $\pm$ 0.51 | <0.0000 | < 0.0000      |
| % TWL                    |        |            | 13.11   | $\pm$ 0.71 | 28.20 <sup>#</sup> | $\pm$ 0.91 | <0.0000 | < 0.0000      |
| % EWL                    |        |            | 29.76   | $\pm$ 1.41 | 68.55 <sup>#</sup> | $\pm$ 1.76 | <0.0000 | < 0.0000      |
| Neck (cm)                | 40.96  | $\pm$ 0.60 | 37.83*  | $\pm$ 0.54 | 36.46*             | $\pm$ 1.13 | 0.00041 | $\leq$ 0.0007 |
| Waist (cm)               | 119.95 | $\pm$ 2.37 | 107.05* | $\pm$ 1.98 | 90.81*#            | $\pm$ 2.10 | <0.0000 | < 0.0000      |
| Hip (cm)                 | 132.19 | $\pm$ 1.78 | 120.68* | $\pm$ 1.65 | 107.80*#           | $\pm$ 1.26 | <0.0000 | < 0.0000      |
| WHR                      | 0.91   | $\pm$ 0.01 | 0.89    | $\pm$ 0.01 | 0.84*#             | $\pm$ 0.01 | 0.0004  | $\leq$ 0.0015 |
| FFM (kg)                 | 61.66  | $\pm$ 2.17 | 56.63*  | $\pm$ 2.00 | 52.43*#            | $\pm$ 2.02 | <0.0000 | < 0.0000      |
| FM (kg)                  | 54.73  | $\pm$ 2.11 | 44.11*  | $\pm$ 1.66 | 31.81*#            | $\pm$ 1.98 | <0.0000 | < 0.0000      |
| TBW (l)                  | 46.50  | $\pm$ 1.87 | 42.51*  | $\pm$ 1.67 | 40.76*             | $\pm$ 1.98 | 0.0050  | $\leq$ 0.0073 |
| % FFM                    | 52.99  | $\pm$ 0.76 | 55.99*  | $\pm$ 0.78 | 62.92*#            | $\pm$ 0.78 | <0.0000 | < 0.0000      |
| % FM                     | 47.17  | $\pm$ 0.75 | 44.06*  | $\pm$ 0.78 | 36.64*#            | $\pm$ 0.74 | <0.0000 | < 0.0000      |
| % TBW                    | 75.78  | $\pm$ 0.56 | 75.68   | $\pm$ 0.54 | 76.45*#            | $\pm$ 0.57 | 0.041   | $\leq$ 0.043  |

Values (means  $\pm$  SE). Parameters defining body composition: body weight (BW); body mass index (BMI); total weight loss (TWL); excess weight loss (EWL); waist-hip-ratio (WHR); fat-free mass (FFM); fat mass (FM); total body water (TBW). ( $n = 51$ ).  $P^a$ -value derived from repeated measures of ANOVA.  $P^b$ -value derived from Fisher LSD Post Hoc test; \* indicate a significant difference with respect to T0; # indicate a significant difference with respect to T1.

### *Bariatric surgery-induced effects on scores of sweet, sour, salty, bitter and umami taste perception according to the rs2590498 polymorphism of OBPIIIa gene or PROP taster status*

The mean values ( $\pm$ SEM) of the score for sweet, sour, salty, bitter and umami taste perception determined before (T0), one month (T1) and six months (T2) after bariatric surgery are shown according to the rs2590498 polymorphism of OBPIIIa gene or PROP taster status in Figure S1. Repeated measures of ANOVA showed that the changes in the sweet and sour scores across time were associated with OBPIIIa locus (sweet:  $F_{(3.66,87.94)} = 3.169$ ;  $p = 0.020$ ; sour:  $F_{(4,96)} = 4.107$ ;  $p = 0.0041$ ) (Figure S1A). The sweet scores determined at T1 and T2 in the participants who carried the GG genotypes were higher than that determined at T0 ( $p \leq 0.027$ , Fisher's test LSD), while no differences in participants who carried the AA or AG genotype

were found ( $p > 0.05$ ). The sour score determined at T2 in the participants who carried AG and GG genotypes was higher than those determined at T0 ( $p \leq 0.0038$ , Fisher's test LSD), while no differences in participants who carried AA genotype were found ( $p > 0.05$ ). There were no significant interactions between *OBPIIa* locus and changes in taste scores for salty, bitter or umami across time ( $p > 0.05$ ).

Differently, the changes relative to each taste quality observed within time factor (T0, T1 and T2) did not associate with PROP taster status of participants. However, a significant main effect of the PROP taster status on bitter score were found ( $F_{(2,148)} = 12.893$ ;  $p = 0.00001$ ), such that super-tasters and medium tasters had higher scores than non-tasters ( $p \leq 0.027$ , Fisher's test LSD) (Figure S1B). No other difference related to PROP taster status was found ( $p > 0.05$ ).

There were no significant differences related to gender or type of bariatric surgery ( $p > 0.05$ ; data not shown).

### A *OBPIIa* gene

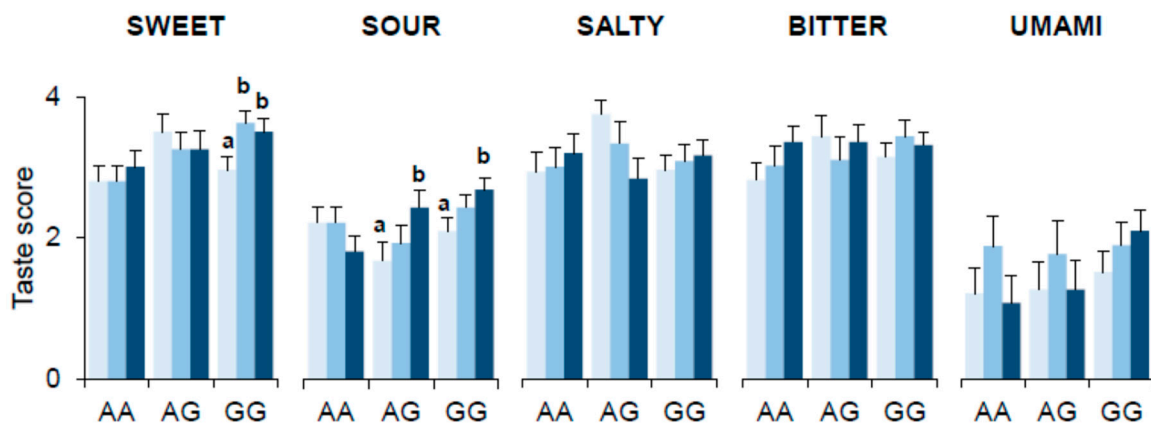

### B PROP taster status (T2)

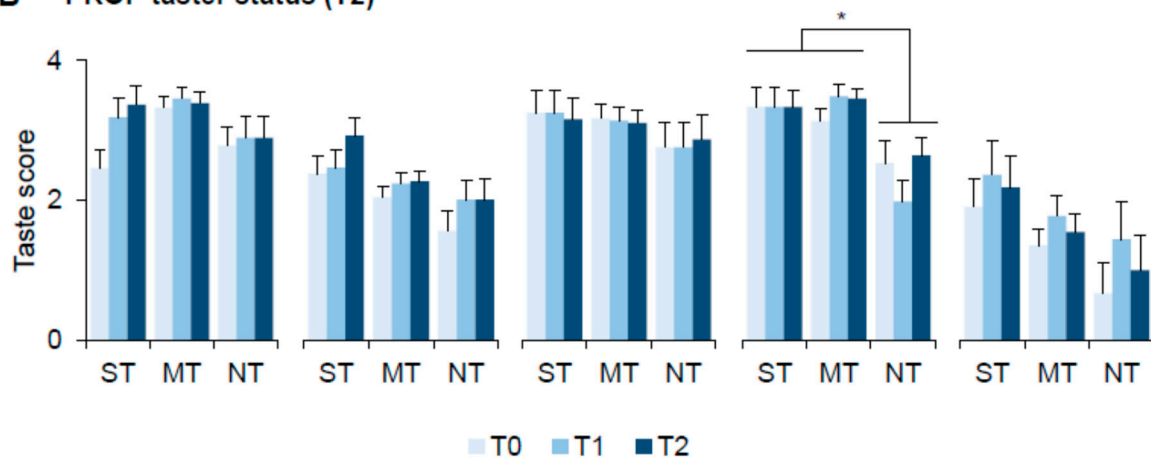

**Figure S1.** Taste perception scores relative to sweet, sour, salty, bitter and umami determined before (T0), one month (T1) and six months (T2) after bariatric surgery ( $n = 51$ ). Means ( $\pm$ SE) values are shown according to the *rs2590498* polymorphism of *OBPIIa* gene (genotypes AA:  $n = 15$ ; genotypes AG:  $n = 12$ ; genotypes GG:  $n = 24$ ) (A) or PROP taster status determined at T2 (super-tasters:  $n = 11$ ; medium tasters:  $n = 31$ ; non-tasters:  $n = 9$ ) (B). Different letters indicate a significant difference ( $p \leq 0.048$ , Fisher's test LSD subsequent repeated measures ANOVA). \* indicate a significant difference between values of tasters and non-tasters ( $p \leq 0.027$  Fisher's test LSD subsequent repeated measures ANOVA).
